# Supplementary material for: Magnesium, zinc, aluminium and gallium hydride complexes of the transition metals
Source: Royal Society of Chemistry journal article supplement (doi:10.1039/c6cc05702k), 2017-01-01

**S1**

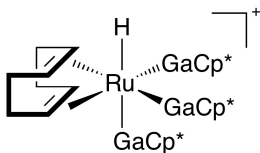

ref. 48

**S2**

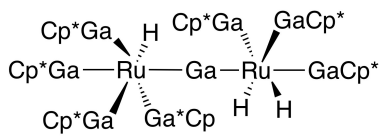

ref. 52

**S3**

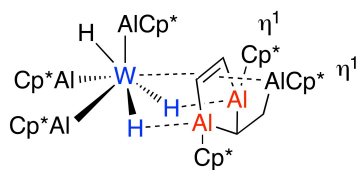

ref. 56

**S4**

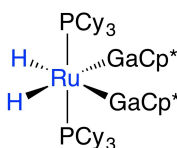

ref. 54

**S5**

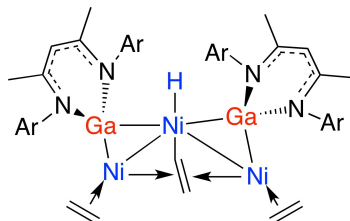

ref. 55

**S6**

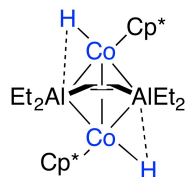

ref. 49

**S7**

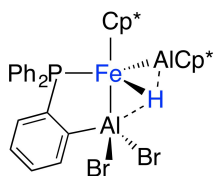

ref. 57

**S8**

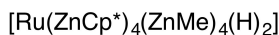

ref. 53

**S9**

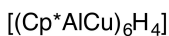

ref. 30

**S10**

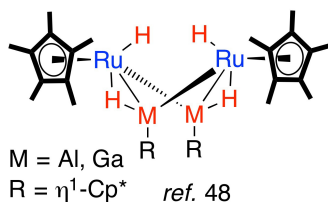

ref. 48

**S11**

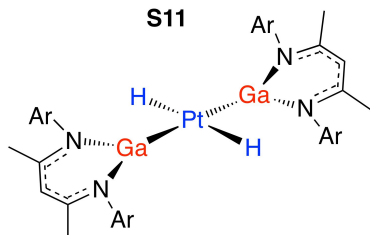

ref. 46

**S12**

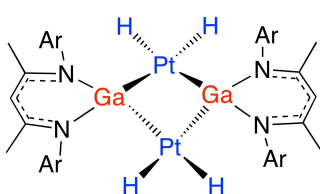

ref. 46

**S13**

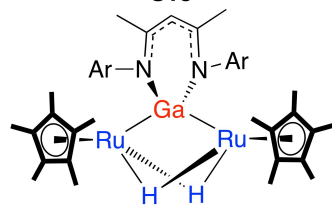

Ar = 2,6- $i\text{Pr}_2\text{C}_6\text{H}_3$   
ref. 47

**S14**

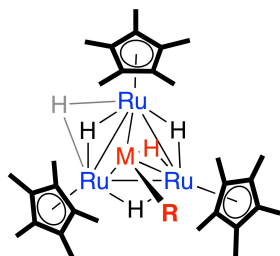

ref. 48

M = Al, Ga R =  $\eta^1\text{-Cp}^*$

**S15**

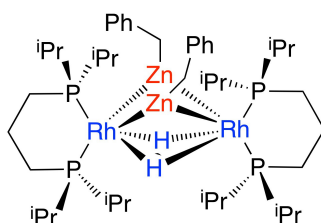

ref. 50 & 51

**S16**

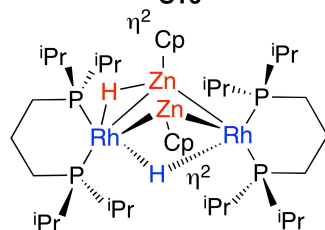

Supplement: c6cc05702k1.pdf [file c6cc05702k1.pdf]
